# Supplementary material for: A Survey of the Presence of Pharmaceutical Residues in Wastewaters. Evaluation of Their Removal using Conventional and Natural Treatment Procedures
Source: PubMed Central journal article supplement (PMC7180812; doi:10.3390/molecules25071639), 2020-04-02
Supplement: molecules-25-01639-s001.pdf [file molecules-25-01639-s001.pdf]

Table S1. Gradient used for the chromatographic separation of target pharmaceuticals

| Time (min) | Flow (mL·min <sup>-1</sup> ) | % A (Water + 0.5% acetic acid) | % B (Methanol + 0.5% acetic acid) |
|------------|------------------------------|--------------------------------|-----------------------------------|
| 0.00       | 0.300                        | 90                             | 10                                |
| 0.56       | 0.300                        | 90                             | 10                                |
| 3.83       | 0.300                        | 40                             | 60                                |
| 6.93       | 0.300                        | 10                             | 90                                |
| 7.42       | 0.300                        | 10                             | 90                                |
| 7.91       | 0.300                        | 90                             | 10                                |
| 9.00       | 0.300                        | 90                             | 10                                |

Table S2. Parent and fragmentation ions and collision conditions for the mass spectrometry detection of target pharmaceuticals.

| Compound            | Ionization mode | Cone voltage (V) | Parent ion | Quantification ion (collision energy, V) | Confirmation ion (collision energy, V) |
|---------------------|-----------------|------------------|------------|------------------------------------------|----------------------------------------|
| Nicotine            | ESI+            | 25               | 163.1      | 130.1 (20)                               | 117.1 (20)                             |
| Atenolol            | ESI+            | 35               | 267.2      | 145.1 (25)                               | 190.1 (15)                             |
| Trimethoprim        | ESI+            | 40               | 291.3      | 123.1 (25)                               | 230.3 (20)                             |
| Paraxanthine        | ESI+            | 30               | 181.1      | 124.1 (20)                               | 96.0 (20)                              |
| Caffeine            | ESI+            | 35               | 195.1      | 138.1 (20)                               | 110.1 (20)                             |
| Erythromycin        | ESI+            | 35               | 734.5      | 158.2 (30)                               | 576.5 (20)                             |
| Carbamazepine       | ESI+            | 35               | 237.2      | 194.2 (20)                               | 192.2 (20)                             |
| Naproxen            | ESI-            | 10               | 229.2      | 170.2 (20)                               | 185.2 (10)                             |
| Ibuprofen           | ESI-            | 20               | 205.2      | 161.2 (10)                               | -                                      |
| Diclofenac          | ESI-            | 20               | 294.2      | 250.2 (10)                               | 214.2 (20)                             |
| Gemfibrozil         | ESI-            | 20               | 249.2      | 121.1 (20)                               | -                                      |
| Atenolol D7         | ESI+            | 30               | 274.4      | 145.1 (30)                               | 79.1 (20)                              |
| Sulfamethoxazole D4 | ESI-            | 20               | 256.2      | 160.1 (20)                               | 96.1 (30)                              |
| Ibuprofen D3        | ESI-            | 20               | 208.2      | 164.2 (10)                               | 79.8 (20)                              |
